# Supplementary material for: FTIP1 Is an Essential Regulator Required for Florigen Transport
Source: PLoS Biol. 2012 Apr 17;10(4):e1001313. doi: 10.1371/journal.pbio.1001313 (PMC3328448; doi:10.1371/journal.pbio.1001313)
Supplement: Table S2 — Primers used for expression analyses in this study. (PDF) [file pbio.1001313.s015.pdf]

**Table S2. Primers used for expression analyses in this study.**

| Primer Name           | Sequence                         |
|-----------------------|----------------------------------|
| Real-time PCR         |                                  |
| FTIP1-F               | 5'-CTAGTGACAGGAGCCAACCA-3'       |
| FTIP1-R               | 5'-TGTTCTTCAAATGGCTCTGC-3'       |
| TUB2-F                | 5'-GAGAATGCTGATGAGTGCATGG-3'     |
| TUB2-R                | 5'-AGAGTTGAGTTGACCAGGGAACC-3'    |
| AP1-F                 | 5'-CATGGGTGGTCTGTATCAAGAAGAT-3'  |
| AP1-R                 | 5'-CATGCGGCGAAGCAGCCAAGGTT-3'    |
| SOC1-F                | 5'-AGCTGCAGAAAACGAGAAGCTCTCTG-3' |
| SOC1-R                | 5'-GGGCTACTCTCTTCATCACCTCTTCC-3' |
| FT-F                  | 5'-CTTGGCAGGCAAACAGTGTATGCAC-3'  |
| FT-R                  | 5'-GCCACTCTCCCTCTGACAATTGTAGA-3' |
| FT(UTR)-F             | 5'-GAAGACTTTAGATGGCTTCTTCC-3'    |
| FT(UTR)-R             | 5'-GAACTACTATAGGCATCATCACC-3'    |
| CO-F                  | 5'-TCAGGGACTCACTACAACGACAATGG-3' |
| CO-R                  | 5'-TTGGGTGTGAAGCTGTTGTGACACAT-3' |
| GFP-F1                | 5'-GACTTCTTCAAGAGCGCCAT-3'       |
| GFP-R1                | 5'-CCCTTAAGCTCGATCCTGTT-3'       |
| Semi-quantitative PCR |                                  |
| FTIP1-F               | 5'-ATGGCAGCCAAAGATGGAGC-3'       |
| FTIP1-R               | 5'-TGTTCTTCAAATGGCTCTGC-3'       |
| TUB2-F                | 5'-ATCCGTGAAGAGTACCCAGAT-3'      |
| TUB2-R                | 5'-TCACCTTCTTCATCCGCAGTT-3'      |
